# Supplementary material for: Age-Dependent Changes in Transcription Factor FOXO Targeting in Female Drosophila
Source: PubMed Central journal article supplement (PMC6514159; doi:10.3389/fgene.2019.00312), 2019-05-07
Supplement: Table_2.pdf [file Table_2.pdf]

**Table S2**

| <b>Primer name</b>   | <b>Direction</b> | <b>Sequence 5'-&gt;3'</b>    |
|----------------------|------------------|------------------------------|
| <i>Act5C</i>         | Forward          | TCGCGATTTGACCGACTACCTGAT     |
|                      | Reverse          | TGATGTCACGGACGATTTACGCT      |
| <i>his1:CG33804</i>  | Forward          | ACACTTCAAGCAAACCTTGACA       |
|                      | Reverse          | CCAACCTCCTTTGCTCTGAT         |
| <i>his2B:CG33908</i> | Forward          | TTCAGGGCTACAACGTTCC          |
|                      | Reverse          | AAACTGAATGCGACCAACATT        |
| <i>InR</i>           | Forward          | ATAGAACGACGCACTTTCCC         |
|                      | Reverse          | CGCGCGCTCTCCTATTATTTA        |
| <i>bmm</i>           | Forward          | CACCGCGCCGCAATGAATGTATAA     |
|                      | Reverse          | TTCAATCACTGTTTGTGGTCGGC      |
| <i>jim</i>           | Forward          | GAGGCGGGTTTAAGGCTATT         |
|                      | Reverse          | CAGGCAAACAAATCAAAGCAAAC      |
| <i>dlg1</i>          | Forward          | CTGTTCTCTGTTCTTCTTCTT        |
|                      | Reverse          | AGTAGTAGTAGTAGTGGTAGTAGTATAG |
